# Supplementary material for: Shewanella sp. T2.3D-1.1 a Novel Microorganism Sustaining the Iron Cycle in the Deep Subsurface of the Iberian Pyrite Belt
Source: MDPI journal article supplement (doi:10.3390/microorganisms10081585), 2022-08-06
Supplement: s1 [file s1]

## ***Shewanella* sp. T2.3D-1.1 a novel microorganism sustaining the Iron cycle in the deep subsurface of the Iberian Pyrite Belt**

Guillermo Mateos <sup>1,\*</sup>, Adrián Martínez Bonilla <sup>1</sup>, Sofía de Francisco de Polanco <sup>2</sup>, José M. Martínez <sup>1</sup>, Cristina Escudero <sup>3</sup>, Nuria Rodríguez <sup>1,3</sup>, Irene Sánchez-Andrea <sup>4</sup> and Ricardo Amils <sup>1,3</sup>

<sup>1</sup> Centro de Biología Molecular Severo Ochoa, Nicolás Cabrera 1, 28049 Madrid, Spain

<sup>2</sup> Centro de Investigaciones Biológicas, Ramiro de Maeztu 9, 28040 Madrid, Spain

<sup>3</sup> Centro de Astrobiología (CAB-INTA), 28850 Torrejón de Ardoz, Spain

<sup>4</sup> Laboratory of Microbiology, Wageningen University & Research, Stippeneng, 46708 Wageningen, The Netherlands

\* Correspondence: gmateos@cbm.csic.es

**Supplementary Figure S1.** UBCG tree built with the full set of genomes of the article. GSI index is displayed below branches in black. Distance is displayed on top of each branch in green. *Shewanella* T2.3D-1.1 has been highlighted with bold font.

**Supplementary Figure S2.** MEME graphical results of the motifs present in the BtuB proteins from *Shewanella* T2.3D-1.1 compared to *Shigella dysenteriae* (RIH4623.1) and *Escherichia coli* (CAD6020855.1).

**Supplementary Figure S3.** Phylogenetic tree of all available BtuB *Shewanella* sequences in the GenBank database with CLUSTAL-OMEGA. It also includes reference proteins from *E. coli* and *S. dysenteriae*. Distances are displayed as number on every branch.

**Supplementary Table S1.** Genomes obtained from the GenBank database that have been used in the different analyses of this article. All the type species have been marked with a bold superscripted “T”. **Species** column indicates the species of the genome, **Strain** column is for the strain name and the **Assembly Accession** column is for the accession code for the GenBank database.

**Supplementary Table S2.** Metadata employed for the elaboration of the Pangenome figure for the. This information is displayed in **Figure 2**. The **Name** column contains the strain names for every single *Shewanella putrefaciens* strain employed. The **Isolation** column has the available data on the source of each microorganism, where NA stands for Not Available. The **dddH** column has the data for the Digital DNA-DNA Hybridization comparing *Shewanella* sp. T2.3D-1.1 to every single genome annotated as *Shewanella putrefaciens* available in the GenBank database.

**Supplementary Table S3.** Raw results of the variant calling analysis using *Shewanella putrefaciens* CN-32 as the reference against *Shewanella* T2.3D-1.1.

**Supplementary Table S4.** Results from the variant calling analysis classified and mapped to the *Shewanella putrefaciens* CN-32 chromosome. Columns with the “variant\_” prefix indicate the type of variant that affects a particular gene or sequence.

**Supplementary Table S5.** ClusterProfiler classification of genes according to the Kegg.db on R. Pathways that are missing information were obtained through the KEGG Mapper tool using the genome of *Shewanella* sp T2.3D-1.1 and comparing it to *Shewanella putrefaciens* CN-32.

**Supplementary Table S6.** Genes found in *Shewanella* T2.3D-1.1's genome that have been mentioned throughout the article. Different row colours are determined by the associated pathway from the last column.

**Supplementary Table S7.** Genes that have 4 or more copies in the chromosome of *Shewanella* T2.3D-1.1.

**Supplementary Table S8.** ANI values calculated with *Shewanella* sp. T2.3D-1.1 as the reference against type strain genomes from the *Shewanella* genus.

**Supplementary Table S9.** dDDH results according to the three different formulas available on the web server. Each colour indicates different formulas from the online server used in the calculation. *Shewanella* sp. T2.3D-1.1 was set as the reference genome against type strains from the *Shewanella* genus.

**Supplementary Table S10.** KEGG mapper information on each for every gene found from *S. putrefaciens* CN-32 with variants. It contains the KEGG metabolic pathway in which each gene is mapped and the identifier and the name of the gene with a hyperlink to the database for further information.

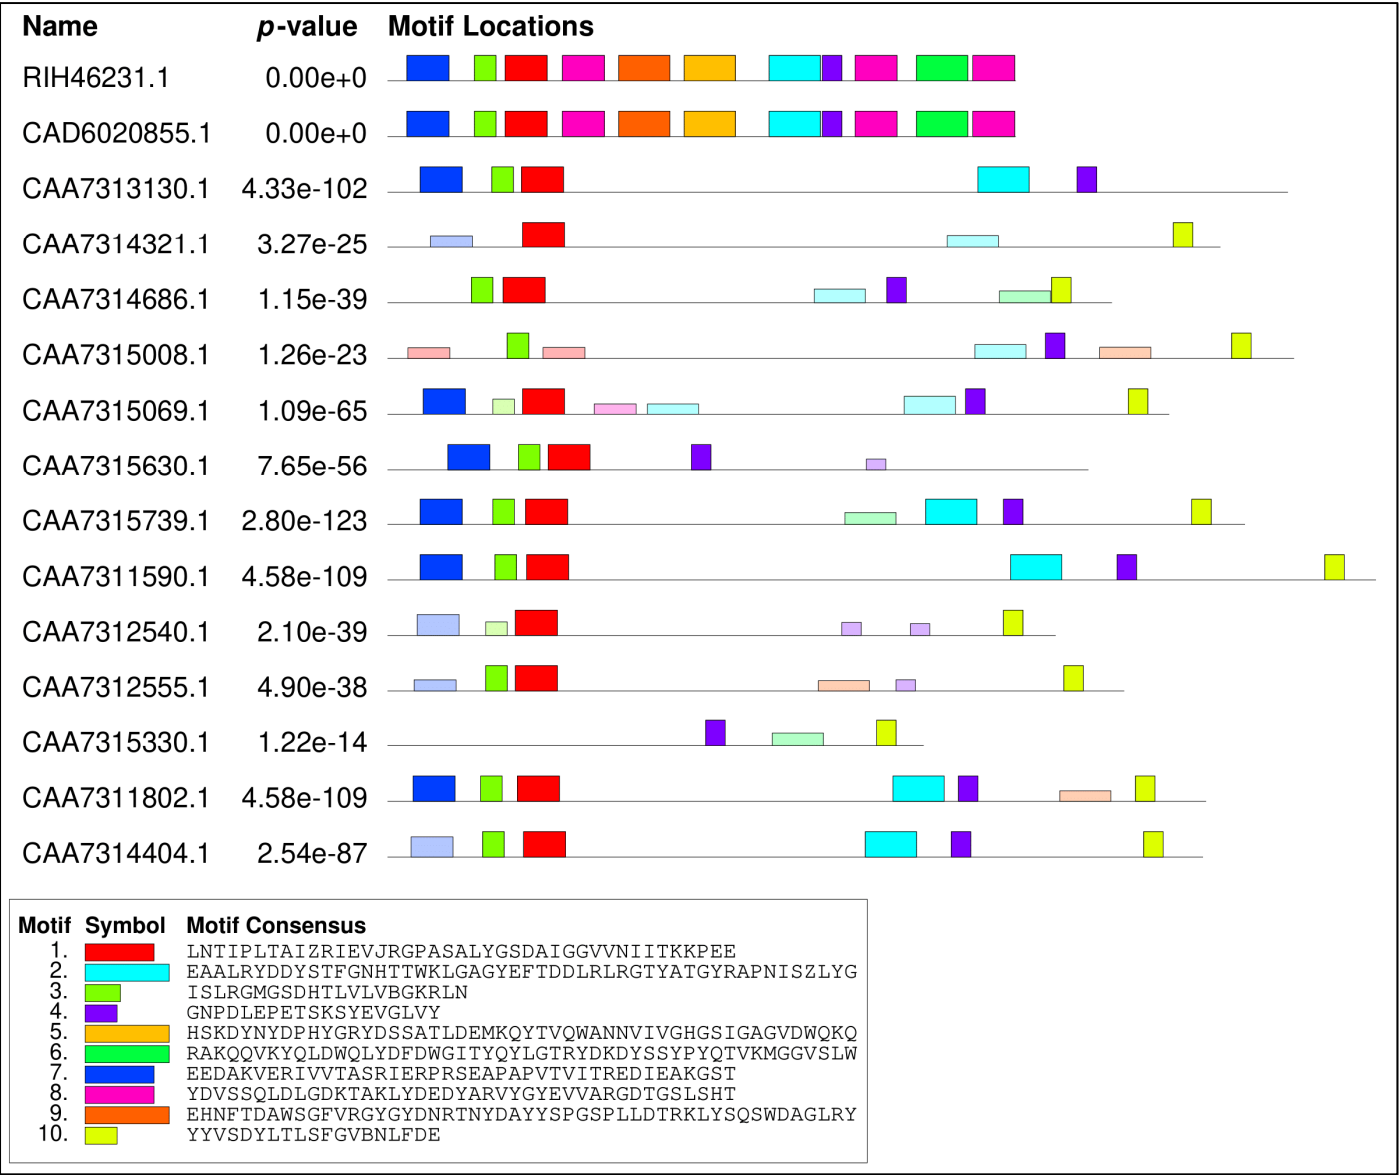

**Supplementary Figure S1.** MEME graphical results of the motifs present in the BtuB proteins from *Shewanella* T2.3D-1.1 compared to *S.dysenteriae* (RIH4623.1) and *E.coli* (CAD6020855.1).

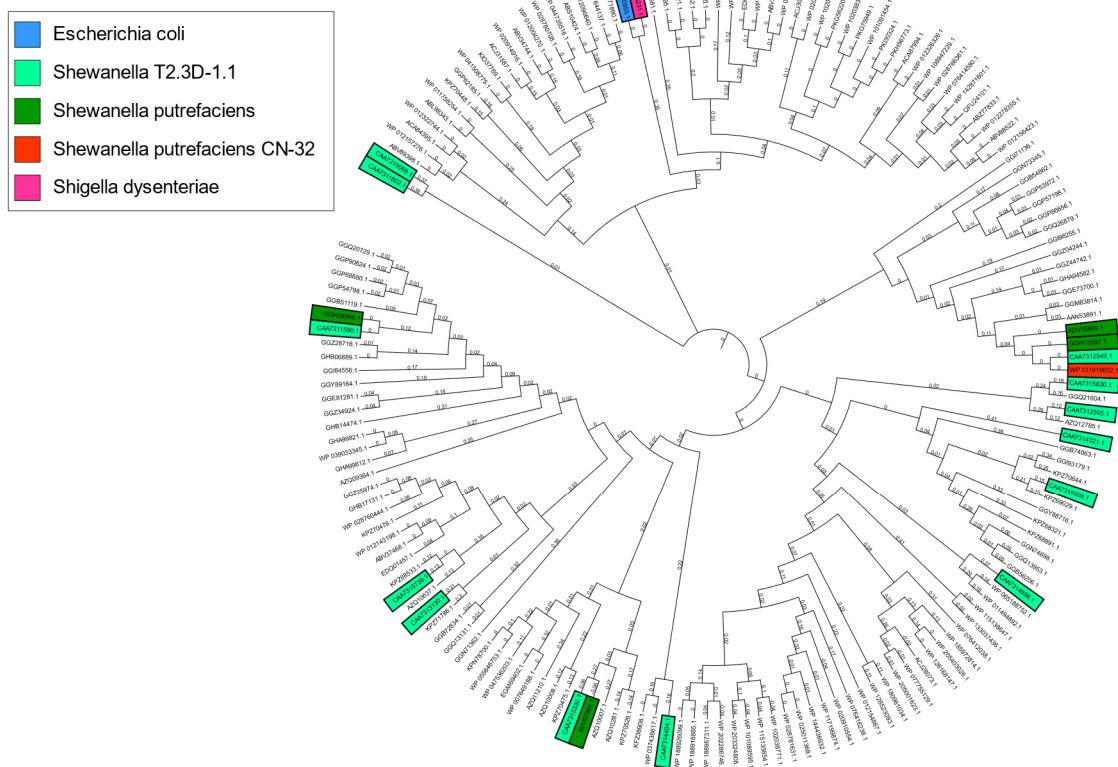

**Supplementary figure S2.** Phylogenetic tree of all available BtuB *Shewanella* sequences in the GenBank database with CLUSTAL-OMEGA. It also includes reference proteins from *E. coli* and *S. dysenteriae*. Distances are displayed as number on every branch.

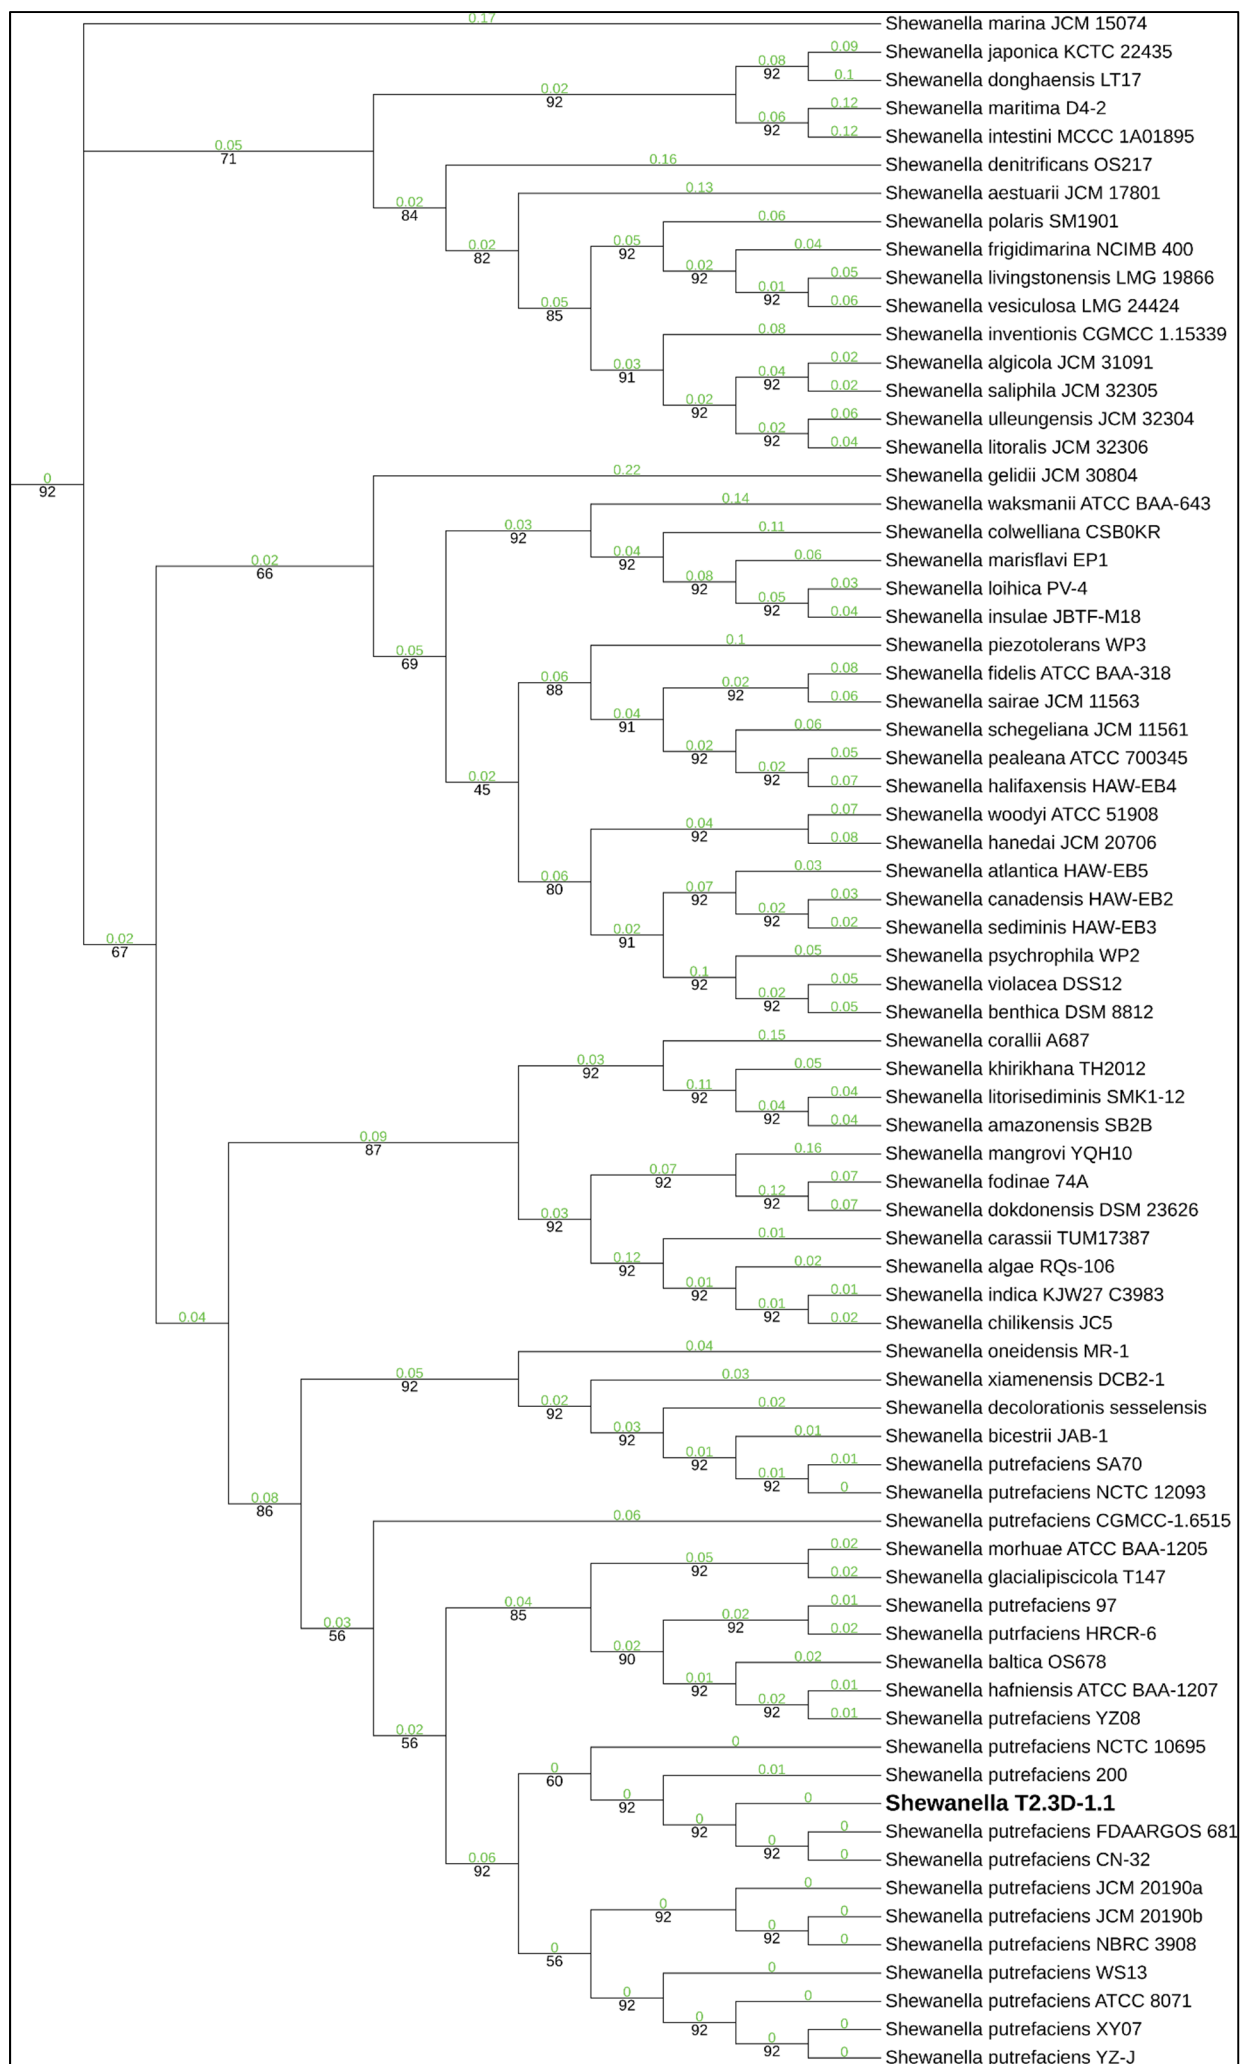

**Supplementary Figure S3.** UBCG tree built with the full set of genomes of the article. GSI index is displayed below branches in black. Distance is displayed on top of each branch in green. *Shewanella* T2.3D-1.1 has been highlighted with bold font.
