# Supplementary material for: Shewanella sp. T2.3D-1.1 a Novel Microorganism Sustaining the Iron Cycle in the Deep Subsurface of the Iberian Pyrite Belt
Source: Microorganisms. 2022 Aug 6;10(8):1585. doi: 10.3390/microorganisms10081585 (PMC9415397; doi:10.3390/microorganisms10081585)
Supplement: Supplementary file 1 [file microorganisms-10-01585-s001.zip]

Archive with 4 entries (4 files):
- Supplement Figures.pdf
- Supplement Tables.xlsx
- Supplementary Material S1.zip
- Supplementary Material S2.txt
