# Supplementary material for: Shewanella sp. T2.3D-1.1 a Novel Microorganism Sustaining the Iron Cycle in the Deep Subsurface of the Iberian Pyrite Belt
Source: Microorganisms. 2022 Aug 6;10(8):1585. doi: 10.3390/microorganisms10081585 (PMC9415397; doi:10.3390/microorganisms10081585)
Supplement: Supplementary file 1 [file microorganisms-10-01585-s001.zip › Supplementary Material S2.txt]

>RIH46231.1 TonB-dependent vitamin B12 receptor BtuB [Shigella dysenteriae]
MIKKASLLTACSVTAFSAWAQDTSPDTLVVTANRFEQPRSTVLAPTTVVTRQDIDRWQSTSVNDVLRRLP
GVDITQNGGSGQLSSIFIRGTNASHVLVLIDGVRLNLAGVSGSADLSQFPIALVQRVEYIRGPRSAVYGS
DAIGGVVNIITTRDEPGTEISAGWGSNSYQNYDVSTQQQLGDKTRVTLLGDYAHTHGYDVVAYGNTGTQA
QTDNDGFLSKTLYGALEHNFTDAWSGFVRGYGYDNRTNYDAYYSPGSPLLDTRKLYSQSWDAGLRYNGEL
IKSQLITSYSHSKDYNYDPHYGRYDSSATLDEMKQYTVQWANNVIVGHGSIGAGVDWQKQTTTPGTGYVE
NGYDQRNTGIYLTGLQQVGDFTFEGAARSDDNSQFGRHGTWQTSAGWEFIEGYRFIASYGTSYKAPNLGQ
LYGFYGNPNLDPEKSKQWEGAFEGLTAGVNWRISGYRNDVSDLIDYDDHTLKYYNEGKARIKGVEATANF
DTGPLTHTVSYDYVDARNAITDTPLLRRAKQQVKYQLDWQLYDFDWGITYQYLGTRYDKDYSSYPYQTVK
MGGVSLWDLAVAYPVTSHLTVRGKIANLFDKDYETVYGYQTAGREYTLSGSYTF

>CAD6020855.1 btuB [Escherichia coli]
MIKKASLLTACSVTAFSAWAQDTSPDTLVVTANRFEQPRSTVLAPTTVVTRQDIDRWQSTSVNDVLRRLP
GVDITQNGGSGQLSSIFIRGTNASHVLVLIDGVRLNLAGVSGSADLSQFPIALVQRVEYIRGPRSAVYGS
DAIGGVVNIITTRDEPGTEISAGWGSNSYQNYDVSTQQQLGDKTRVTLLGDYAHTHGYDVVAYGNTGTQA
QTDNDGFLSKTLYGALEHNFTDAWSGFVRGYGYDNRTNYDAYYSPGSPLLDTRKLYSQSWDAGLRYNGEL
IKSQLITSYSHSKDYNYDPHYGRYDSSATLDEMKQYTVQWANNVIVGHGSIGAGVDWQKQTTTPGTGYVE
DGYDQRNTGIYLTGLQQVGDFTFEGAARSDDNSQFGRHGTWQTSAGWEFIEGYRFIASYGTSYKAPNLGQ
LYGFYGNPNLDPEKSKQWEGAFEGLTAGVNWRISGYRNDVSDLIDYDDHTLKYYNEGKARIKGVEATANF
DTGPLTHTVSYDYVDARNAITDTPLLRRAKQQVKYQLDWQLYDFDWGITYQYLGTRYDKDYSSYPYQTVK
MGGVSLWDLAVAYPVTSHLTVRGKIANLFDKDYETVYGYQTAGREYTLSGSYTF

>CAA7313130.1 BtuB_1 T2.3D-1.1
MLRSNLLANSVRLALVGGAAAVALTAPMAFAAEDGAKVERIEVTGSRIKRTDMEAASPVLVMNRDEIEATGMISIGDILQ
TIPAAGSALNTAFNNGGNGSTNMDLRNLGSQRLLVLVNGKRWISSLGSTVDLNTIPTSAIDRIEVLKDGASAVYGSDAIA
GVVNIITRKNFEGVEVSVYGGENAKYNDGRQYTADITFGSVSEKGGILFNMSHVTQQPIWAGDRDISDTGYSSTTDNTRL
QIKGSQLNQTNQDALALIATPSDKGIYNLMTKEGTGTNLGPDQFRPRTGADVYNYAPDNYLSTPQNRNSFYIQGFYDISD
NLRVVSDFMMTNRKSSQELAPMPLTLGASFGAAASRVDIGANNIYNPFGEALYGDSARAVAAGVVDDPKDYTPYALQRRM
LEAGSRRYEQNDTTYRAMVGLEGNLNDNWTWTANYIYGQNSQDELTTGLLNLTRINQALGDNCNASNGCVALNLFGGPGT
VTQDMVDYISFDSVSRSGLTMKDYAFSISGDLFDLPAGSVGIAIGLERREETGFDTPDPLTVTGESSGNQRDATSGGFRL
DEAFVELSIPVLESLLVTPAIRFSDHDAYGNNTTGKVGVEFRPMDDMLLRGTWAEGYRAPSISDLYAGSADSYPTWQDPC
NNPNGQLDLSKNPGCAAVPVGYNQANTQIRISQVSSPDLKPETSESYTFGTVYNPRWLEGAEFTLDYYNIKVEDAIGRYG
HTRIARECATLSNPASCDKIDRDSLGNIVDLRNFLQNAGEYNVEGIDFFTSYRFPETSFGSFKASLDVAYVIKNEFDGTD
RVGIQTGDGGFPEFKSNLMVDWAMGDWDAHWKVRFVGEMTNDYYTDVDEEDYKFLKNNGYRENFSAYMVHNVSVGYNIDD

>CAA7314321.1 BtuB_2 T2.3D-1.1
MKSFRLSLTALACLSALSQTSYAEANSVSSNSEANIERITVYGRQNSVVKNSGLATKSDMSLMETPAAVVIVDQDLIETQ
GTDNLQDLIRNISGVTQAGNNYGIGDNIVIRGLGANYTYDGMYGGAGLGNTFNPTRSLTNVESVEVLKGPATGLYGMGSA			
GGVINLIEKKPQFESKNKFIAEVGQWDTYSLALDSTGGLTNDVAYRLVAKTARSDGYRDIGTDRDEMYGALKWVLTDSQD			
LMLSGAYIKDAIAVDSIGHPIRIYNADSVGGKTAGEVTWQDLINDPSGKGLQLTDEQRQQLAASLSSGDGLTPYSFGDAG			
LISPMAKDNEGEELRFKLTHNIYFNDNLFLNQQVQYRDYTSGFARQTGAYNYVYWKQGKNPINTEPRAPLVENGVLYPFA			
ARRQEYRKVDADETSWQYFADLRYDFQIGHIDNELLINANYEDRNIRFKQYSIYDADQVFKDKDGKITYQGSLPYIYDIR			
HPNWGTGKFEDYDPLKTANYNKTVSAWGLGLQHVGYLGYGFTTRIGIAFNEIKQSYEHLGLDPRYSISQSQATPEADTTD			
NGMTYNLGLTYMPIEDLSFFINHSKGRTAYSVLDVVKDNATNRDDSESISNDLGMRFKAFEDQLLGSLVLFKSSRTNVAY			
NNPDYTNGILTPNIPVYFYDGSEDTQGVELDLNAHLNDQWRVNLNGMYQDARDKQNPNDIANYDSRQKGVPYVTASAWVT			
YGANWFALSSPIELSLGAKYVDDRSTHSSSFGIPDGYVPSYTVMDSAISYTADSWKIQFNINNLFNKDYYNKAMFLGGMP			
GEERNVKLQYSYSF

>CAA7314686.1 BtuB_3 T2.3D-1.1
MAANSAYLSHAFNTSILYSSLAIALGIAPITQAMADDSEVANIEHIQVHGQQSEPRNILGSAENRLKEQGVDFSEAGGVS
ALPILNGMMGDRIKVLVDGADITASCANQMNPPLSYISANQITTAEVIAGVSPVSAGGDNIAGVIKVSSLNPKFGESEAI			
KWNSGDISTGYRSVSDTLLLGTNATVASKNVSLSYQGAYEDSNSYKDGNGDKVIDTLYRAQNHALTAAWRDETQEVAIKL			
THQNIPFQGFANQYMDMTDNKSYGALARYQLKLDDDGEFSAQVNWHGVKHEMGFFTPEKTGKMPMNTEGDDYSYQLHWRL			
PMGDDSTLLVGQEYYSYQLDDVWPSVPGTMMAPNDYININDGQRKRAAVYGEWQQDLSQSWWLSAGVRFEYVTTNTGEVQ			
AYSPSSMMGMPNVDAQAAKAFNAMDRSRDDNLIDATLLARYQVSTNQQLEFGLARKNRAPNLYERYSWGRGTMATTMIGW			
YGDGNGYVGNPDLKPETAHTLSAAYKYNGDSWQVSTTAWYTAVTDYVDAEVIGSFNRTNTPDGKRNILQFTNLDANLYGA			
RFNALYQFAETSTGKWQVLGKVNVTRGERDEGDEPLYQIKPLQTELALQHQLGNWENSLSWQWVATKDRVDDRRLENETD			
SYSLLNLNSSMKWQDLTVTFAVNNLFDSYYELPLGGVSVAEFKADNTNGFNRVAGAGRSFELSASYAF

>CAA7315008.1 BtuB_4 T2.3D-1.1
MNTKTIIKLWKGNEMRPSTFKKSVLATNIAILLGSAVSVSAVAANDAVAAPENIEKIEVRGMRASMKASVNDKRFSDAVV
DAVTAEDIGKFPDGDVGESLGRIPGVAVNRQFGQGQQVSIRGASSQLTSTLLNGHSVASTGWFDQQNIDRSFNYSLLPPE			
LVGGIQVNKSSQADIAEGGIGGTVTVKTRKPLDLDANSVFLSAKGDYGSVSEEIDPQTSGLYSWKTEDEKFGFLVAGSLD			
KTEYQRNGIESLLGWGEIVPTTFQQDRERTALNAAFQYRPTDALEFGLNIMSLQLDANNANTSIFLFPTQRGENTCLKKN			
AAGVCTLVEHTDKDGFAWAQTWARKASMSSDTIDLDFTYQADDYKLEGRIGKTKAEGGTDLTSNYGQSIGKPEDFAGIYD			
ATGDVIKINIANNSFDASDFNGQLETAGWALKKQPNTDEEAFATFDITIPVELGVITSIKSGISYADHDVTQTTEAALSS			
NIMAKDASAYYSGTMSSGAGFTLPKPIFNNMINDAYAAIDGFTLDKSGYGTLQEKNLALYTMATFASEGVRGNFGLRYIS			
TDVESDYYALSDSGVYADVLSTDKASYNDVLPSVNIAFDLASDLILRASAAQVISRPNYADLFATSKLPGFNDGTPGNEK			
KVTGNVNLQPFKASQADLSLEWYFSGEGLFAATYFIKDVSSFISTREKLNQEIGIEDPNLVIAGGSSCGVGIYDCWTVSE			
NFNATGGSIDGIELQLQDSFDNGLGYSVNYTFADASSPAENYADRVGVFSDSSKHTVNLVGYYEMDNFSTRIAYNWRSEY			
MMRELPGFYGNREHQAYGTLDLSANYNVTDYLSVTFEVVNLLEEDSIQKGVSPVNAPGVISEFKDNYPVWSFDGEARYKL			
GLALRF

>CAA7315069.1 BtuB_5 T2.3D-1.1
MMYLGRSPHIPYPLSVLALTLFLATTGMQAQASTTKETDEMEIIVVSATRTAQDIKSSPSAINVITEEDIQGMTLFTIDE
ALGKTAGVMDRRTKGFMETTPSLTIRGLSNARDTLVLVDGVPQNDSRNGQVNWTMIDSENVQQIEVVRGPFSSLYGGNAI			
GGVVNIFTKVPEENSFSMKMGIGGPADSIAPENFSDQALQGTLKILDSVTLGANYRKRETDGYPTTHVNASDAVIDKLPE			
GVTGWVPYTTNVGGKSNLIGDMGDNWFNDETYGLRLTYTPSDDTRLNLSYANSDSVYGYDQPHSLLRTTEVTASGKVDSI			
PTYSNIPMTTWLNGALFARGGSTTQTNTGLNLSTSWDQINLHISAGHISKETTTIIAGLTTANAGHAPINPVTFEGGDGR			
LAPATESTRKSIDVQLDMPLSDNHTLVLGVAANEGDVTEERWSLSNWTDPTSKVFMSADTTAKDQIRSFYVQDAWQLNDK			
FTAYIGARQDWWKMRGGESHSYTQAGGTGSITYDKVTDSPISPKISMVYKPSTNTSYRASLGKAFRAPNLYEFFGTANLG			
GNIYVGNPDLKPETLVSWELGVDHSFQNNINAIATIYRSEIDDRIATQTVDGISMPQNVAEAKIQGVELELKGTWHYGLG			
WSANYTYTDSEVTQDPNPNVVGKALPHTPKNMYNLNLNWRQGDWYITANHSYQSKRFTNVTNTDVVTHVPGSTDSFMLTD			
VKTTYFVSDNITASLGINNLFNEQYNQFYLSPGRFWFAELRLSY

>CAA7315630.1 BtuB_6 T2.3D-1.1
MPHLSPLALLLLSLVATSSYGAPVNEKDKHAAELVSQHEHEASHEQDSHDDKHTDEHGDDHDEGMERILVQSTRLGRIVD
DQPMRVEVVTHEEIEEKAAMRPGNISMMLAETGGVRVQTTSPALGSANVRLQGMDGRYTQLLADGLPLYGNQASSLGLLQ			
IPPTDLGQVEVIKGSASSLYGGSALGGVINLVSRRPGDEFAGEALLNLTSKNGQDFTGYAESPLSDNLKGSITAGAHYQT			
IEDIDADGWADLPEYERYTLRPRLFHEGDNGDNLYVTAGYMTENRRGGTLNGHTVADGNPFVETQNSERMDAGLVYHRPV			
ADTLTFSTRASAMVQEHFHGYGVDNDNDKHGNYLLETSLSGYRDNLDWVIGAAYQSDTFESDNYSDFDYSFDVPGLFAMV			
DYSLMEDLIASVSARMDHHSQYGTEFSPRFSLLYRADGFTVRGSYGQGYYAPTPFVEEIEAAGLSRLEPLGELKAETART			
ASVDFTYRFDDLETSLTLFGSNIRNVTELEAFSLENNDTFDRVRLVNAEGESQIRGSEMLLRYYLGDLKLTASYLYLDAT			
EPAQGRTSRREIALTPKHSAGFVAMWEQHGNFRAGFEAYYTGIQRLNDNPYLTESEPYWHLGLMGEMTFGRYSWFINLEN			
LLDIKQSDTHPLLLPERTPAGQWTTDIWSRNDGFIANAGVRIKFG

>CAA7315739.1 BtuB_7 T2.3D-1.1
MIKRTKVAAAINVAIVTSISAGTFVASNSFAAEETAKVERIEVTGSRIQRQDMETASPVTVIDAAAIKAEGFTSVDQMLQ
VQTSMAGAAVGSSTNNGADGVAQVDLRGMGSQRTLVLLNGRRMVNSGSGADSSVDLNSIPVAMIARVEILKDGASAVYGS			
DAIAGVVNIITKKDFEGFQLDFNGSGTDKGDGRNGDVSALYGFNTDGGNYTFGAAFSDRRDVIQADRDWTATGESWSIPT			
GALDYMVKDANGNWVDQEEVYDYTQDSYYQTPSERRSLFANMTQELGNDVVLTADAIYTNRRSHQQMAAQPANIGLNVCG			
NANVPAGAPCITLDSAMTAAGIKANDKGLVNYRRRTNEVGPRIYTQDTDTWRLSGGLAGTLDVHTGMNWDVTYTYGKNKA			
ETAVENSINATDMATSIYANPDAWFSGAPLTQQTINAIGYSEKANGGNEQQTLSAGLNGELFDLKAGAVGFAIGAEYRRE			
SGFYNPDPIVVAGESTAAQQDPTDGNYNVVSIFQEVSVPFTEKLTGEFALRLDDYSTFGKATTWKIGLTYTATDDLMVRT			
VAATGFRAPSVAELYGGNSGSFDYLKDPWGNIKDAQILVNRTSDPDLQPEESESYTAGLVYSPSYIDGMSVTLDYWRFKL			
DNAIARMDTQVGLNACHAGDASACETFNIGAGGNLDNLTNALTNVGSQDTSGIDFNLAYSFGLIGLDWKVSNDTTYLVKF			
EQDGEEYTGTIDGNFGAYARVRNNFSISAGQDDWSVMYFNRYIGDMRDLAEGNKVGDIIYHNISGTYHINDMTTVSLGVK			
NFTDEKPVTVSNGSDGGTVPEVYDTIGRTIYGGVTVKF

>CAA7311590.1 BtuB_8 T2.3D-1.1
MRANSTLAKAVRFALISGATTAVLSTSVAIAAEDGAKVERIEVTGSRIIREGAIAPTPVTVITGDELLSTGVTNIGEALN
QLPALGNTYSLANSGRFIGTSGLNLLDLRSMGTDRTLVLVNGKRHVASSAGTSSVDVNTIPSVWIEKVEVITGGASAIYG			
ADAVTGVVNFILKKDVEGLDVSATKGWAGDNPLSKDRVALSYGTNFDQNRGNVAFAVEYSAQNQLKAFDRDETSTSFTNL			
KNTNRPIGPDGKPIDSNHPSDPDKYYTPNGGHYTISNAGTFFLDGWKTFNPDGSLRDVYSGPKVDGIYCVDCDYTNLNQF			
VELQPEFERYNINFKTNYQLNDNMNAYFEAKYVNSQASNEGQPAFFFGRDSVNILKNTDVKIDNAFISPELVALMKANKD			
AQGNPAPLDTINIRRFMTDLGQRIEDDTRETQRYVLGLEGLVFEDWDYDVYGVYGQTDLERVNKNNLVLANYQHALDSIN			
VDGIAVCRDEDARAAGCVPLDIFGFGKPSQAAIDYVNTTSTGTSVIKQTVLGGSLTNSALFDMPAGVVGFSTGVEYRKEE			
SEIFEPANAAGTFFNALGEDKGDFDVKEVFAEVSVPLLADLPMIRQLDMELAVRFADYSTIGNATTWKAGLSWEVNDDLR			
IRSTYSEAIRAPNISELYGAESQTFFSIEDACRTKYLNDLSNPDIRKANCAALGVPSDFNSDYDSKRVEGVSSGNRALDP			
EESKSYTVGLAYQPNFIDGLSITTDYWNITIDDAISAVSAQNIIDRCVDSASGINNEYCALITRNPTTNEITSIRQSSLN			
IASLEAAGIDFDIGYNFDAFGGDFRTNLIATRLLKRKDYSFQDDPNDFEELAGTLGYAKWQANWSLNYSIAQWSANWRTR			
FIDGVSLYTDKELARNANPSSNMEYGVYFISDISVAYAFDSGVTLKFGIDNVLDRDLPYGTTGTSAGAAAYDNVGRFFHT			
TASFKF

>CAA7312540.1 BtuB_9 T2.3D-1.1
MGTNPTKIALLIGSLCSFSIIAPALAADDTHTARVDEHLVVIGRTDNTPLNIAANVNVIDAAAIEMSGATSLTDVLRGRS
GIQISDNNIGTSFAMRGFSASTAVNNTLILLDGRRLNNIDIAAPSLNAIPLNLVERIEILSGSAGVLYGDQAVGGVINIV			
TKSPENTSGSVQLSGGSFDTYEGRGDISGAINKDWRYFFTGSYNQGDNYRKHNANETGSILGRIQYKTDTDAFFVETSYY			
DDDRENPGSLTKDQFKQNPRQSSNKSEYVHEMTTAARSGYEHQLNPNWALAADLDYSDTLVTSLNWGAGSHNTRSLLMFS			
PKALANYTTRQGELNLVAGLDLSRGKADYNTMARSNVQEMQSAYVQATVPLSHSLSYVVGGRYARVTDELVDGNVYPNGI			
DLDEDATAFEFGLNYRPSAEHRFYLRGDENFRFAKVDEQAYTPKDVYGLKPQTGRSYEAGWDWTVASQSLRVSLYRLDLE			
DEIVFDPSAEKPVGGSFQGANVNADASLRYGASADWDWQITQALQLGLEYNYIDAEFTDGVNDGKALSWVAKHTGRGYIS			
MDFAEHFQVFAEAIYTGNRFIEGDNANEGDKLASYVLGNLALNYNRDAWLASLRVDNLFDKEYVSSGYYGGGLWDSYYSG			
RGRDIRLTLGYRF

>CAA7312555.1 BtuB_10 T2.3D-1.1
MKPTYLATILAILLSPQLVVAEEVDSAETANIERMSVIGVRQRLEQAGTLANTIMKTEVINATTIENKNAVNLSEAIDNS
PGVKVSNECSMCGVKRIMLNGMKGEQTTILVDGLPVHTMISGYYAVDAIPTTGIERIEVARGAGASLIAPEAIGGTINII			
SYEPTENGAELDVSAGENGYRKMGFLGKGVSEDGRTRATLVAQYDDRDQFDADHNKVNEAPQQENRSLTARVSQDVTDTD			
NLVLRIANIQSEIFGGPMLGSTFADGTASSIGNVLSGFDDQFSEPQQLFEDGDVRKPFTGKAWETTEWIKTERNEASLAW			
LKEFSDDWNMHLAASYAEHKQDSFYEGFDYTAEDKMWFFDARFNYLLTENQLLTFGADLRTEEMRSHSRAGSANPNYASD			
SFDYDVKGVYIQDTWQATEALEIAMALRYDTITADFTDPNKPGTELDESILSPRLDVRLRHNDEWTSRVSAGRGYRAPLS			
FFETDHGILDGSLGFDIDIDELERSNSASYALSYEGEKLTSTASIAWTEVEHLAALTTNDLGIPLLTQLDEKATVITSDI			
ALGYRLTDDMTLSLTAEHFDYDSVFKSSYAIAPIEERLTLTFDWDVNDWEFFANVVWVGSRDLSKYGYEGYNRLDANGQV			
DPDSKKTTDAPSYLTVDLRVSYQLNEYLSLYSGVSNLFDYTQAGDEETPLFYDAEGAFDVGYIYGPLRGREIYAGMKLAF

>CAA7315330.1 BtuB_11 T2.3D-1.1
MNWGVKQKEYGTILAVNYEKNKGEGDFFTGRDTDRTSTDILFKINASSLLGARNPQMTEFTYQFLDVDSYRSLLGVTGAD
WLKNPMMQYSASAEDQAIGRYHKYQLSHQVNLGNSQFITDFYYHSYAQQLSQVNQFNGLVIDRQSLAEIAAFDRQPWNSG			
AELAALEQDNDYSAFGAQTQSVNQYGEHQIIYSARYHTDKAEMRFAEQQSMWLPDRSIVKAASSSILAYTDDATALTSSV			
DSLLKWEGLQFKLGVTYEHVDVNREVHSAYAGLDAVDFSDSDWMPQLGGFYDAGNWRFSTDIRRAWTAASAGNLEQEAQV			
SLHYQVSMQYALEGVNANLKAYMQEFDNLHVDCNAYSLCADARLFTQENIPDVQTYGIEVSLGYLWNVEHLTFPLSLNYQ			
YINSEYQTNTCTEIQGCVFAGDKMAWLPEQQLQFSAGMKYEAYEVNVNAFYQSERELSQFGAELTPIAGQLRVDLAASYQ			
FDRHHRLYFRVENLLDESLVTTASNSGIRVENGRISYLGYQWRF

>CAA7311802.1 BtuB_12 T2.3D-1.1
MLFRQTCLAAAITAVFAGNFVQAEEAPDRKMEVIVVTASGYEQKLVDAPASISVITQEDLMIKPYTTLLDAVRDLEGVDI
GETRDKTGQGTISLRGMGSDYTLILVDGKRQNNHGDIYPNSFGGNQFGHVPPLDAIDRIEVIRGPASTLYGADALGGVVN
IITKKVGDEWSGSATHSRTNQTNDAYGEDITTDFSVMGPLIKGVLGLSVHGSIYDRMGSTPEYAPVNYPNGEVRTRSLGF
GGGGKTVDNENHMLGGSLSWTPNEHHKIWFDLDSSSQEYDNTPLINADGVREYPLGTVDNLESLWVASNFCKGGVGSREA
ACLASGGEWARRSNPRVGYSETQKFTRDAWALTHEGAWDFGTSFVSLSYVDTQNHGRTLPFTTAERTLLLQMIDGKGAYT
GMTEAERKAIVSSTFLPRPKREMASNQYTLDMKLDIPFEAAGNHVAVTGAQVIRGELKDGVFGMEEGTPGAVQEHNMWSV
FAEDTWSMTSDLSVTAGLRHDDHEIFGNQLSPRLYGVYTINNEWTVKGGVSTGFKTPKTTQLYDGIVGFGGQGTSPQFGN
PDLEAETSVSSEVALYWSHPDGHNFNVTVFKNDFDDKIASQPCGTGTSIECSDAGEYADLGYAVSTKTVNIDKVTIQGAE
LAGRWEILDALTFNANYTYTDSEQKSGAEQGRPLGNSAKHMANATLKWEITDSVNVFLTSEYRAKRYRSWDTINDAPLYY
KGYNVFHLGGSYQASEFVTFNMRINNLFDKDFTTYDIVFTECSDTSATCVSDDNGQNGYTASYVDDYNNKDKARNLWVSM

>CAA7314404.1 BtuB_13 T2.3D-1.1
MRLAVIALAVSSTLTMSAAQADSQHAAVEKIEVIGSRIALRTATDSVAPVDIITAEQLESTGMTETAKALQFAAPSYSFPF
SSVTDGSDAVRPASLRGLSPDHTLVLVNGKRRHGSALVHLSGTMGKGSSNVDLNAIPMTAIKRIEILRDGASAQYGSDA
IAGVINVVLKDSDQGGSVSAQAGQTYQGDGEQWRVGVNHGISLSNDGFVNVALEAHHKDSTNRAGLDPRQQYPKLADGSD
DPREATFNRKSHQVGDAEYDNVGLFINAAQPISTDGKLYAFGGISQRETKSGAFYRLALDARNLPEVYPDGFLPQINPKI
IDSSLTLGYEFNLSDWDIDTSVGYGKNSFNYNIVNTLNASLGPESPTEFDAGTLATRETNINLDISRYFAFVNDSEILFA
TGVSWRQNGYEIEAGEEGSYINGGYNGKAPGSQGFTGFTPESEVDETRDNTGIYAELENQLTNEFYWAAALRYENYSDFG
GNTSWKLAGRYDFTDNLALRGTINTGFRAPSVQQLYFSNISTLFNPDPVTGQLVPVESGTFNTLSPVTKALGINELEPEI
SQSFSLGLVYTNDSGLAVTLDTYQIEIDDRIILSGSLRATDSPAVAAALAGTNADSARFFVNAVDSRTRGVDLVVSQDID
IGTWGDLRANLAYAYNKTEIQDINLPSILGGLEKKLFDGIERTRMTSATPHNTGSIGLTHELGDFKTNARLNYFGDYSEG
YSTGDVNYSDQWVMDLSVRYAATDALSFTAGVQNLFDVYPEKRPDNNNFNGIFVYPLTNTPFGFNGGYYFLEAKYTY
